# Supplementary material for: Colonizing the High Arctic: Mitochondrial DNA Reveals Common Origin of Eurasian Archipelagic Reindeer (Rangifer tarandus)
Source: PLOS journal article supplement (doi:10.1371/journal.pone.0165237), 2016-11-23
Supplement: S5 (10.1371/journal.pone.0165237.s005) [file journal.pone.0165237.s005]

100  $\mu$ l EDTA blood was added 1000  $\mu$ l lysis buffer. The samples were vortexed before they were centrifuged at 13000 revolutions per minute (rpm) for 1 minute and the supernatant was removed. This step was repeated once before washing the pellet with 1000  $\mu$ l Tris-EDTA (TE) buffer (pH 8) and centrifuged at 13000 rpm for 1 minute. The supernatant was removed and the pellet dissolved with 100 $\mu$ l PCR buffer with detergent containing 1  $\mu$ l proteinase K (10 mg/ml) pr. 100  $\mu$ l buffer. The samples were incubated on a thermomixer for 2 hours at 56 degrees and 700 rpm before inactivation of proteinase K by incubation for 10 minutes at 95 degrees.
